# Supplementary material for: Synthesis and Enzymatic Incorporation of Modified Deoxyuridine Triphosphates
Source: MDPI journal article supplement (doi:10.3390/molecules200813591), 2015-07-24
Supplement: s1 [file s1]

# Supplementary Information

## S1. Materials and Methods

All starting materials were purchased from Sigma-Aldrich, Alfa Aesar and Fisher Scientific, and used without further purification, unless noted. NMR spectra were recorded on a Bruker Avance 300 Spectrometer, ESI mass spectra were recorded on Bruker Esquire-LC, and HPLC was performed on an Agilent 1100 series instrument. UV spectra were recorded on a Beckmann DU 800 spectrophotometer.

HPLC purification was performed on an Agilent 1100 system using a Phenomenex Jupiter 10  $\mu$  C4 300 A column at a flow rate 1 mL/min. HPLC solvents contained two buffer systems: A, 50 mM triethylammonium acetate (pH 7.0) in ACN/water (1:1); B, 50 mM triethylammonium acetate (pH 7.0) in water. The purification was conducted with a step gradient as outlined in Table 1.

**Table S1.** HPLC solvent system.

|             |   |    |    |    |    |
|-------------|---|----|----|----|----|
| Time (min)  | 0 | 10 | 18 | 19 | 24 |
| % ACN/water | 0 | 1  | 25 | 50 | 50 |

NMR, MS and UV Spectroscopy and HPLC purification

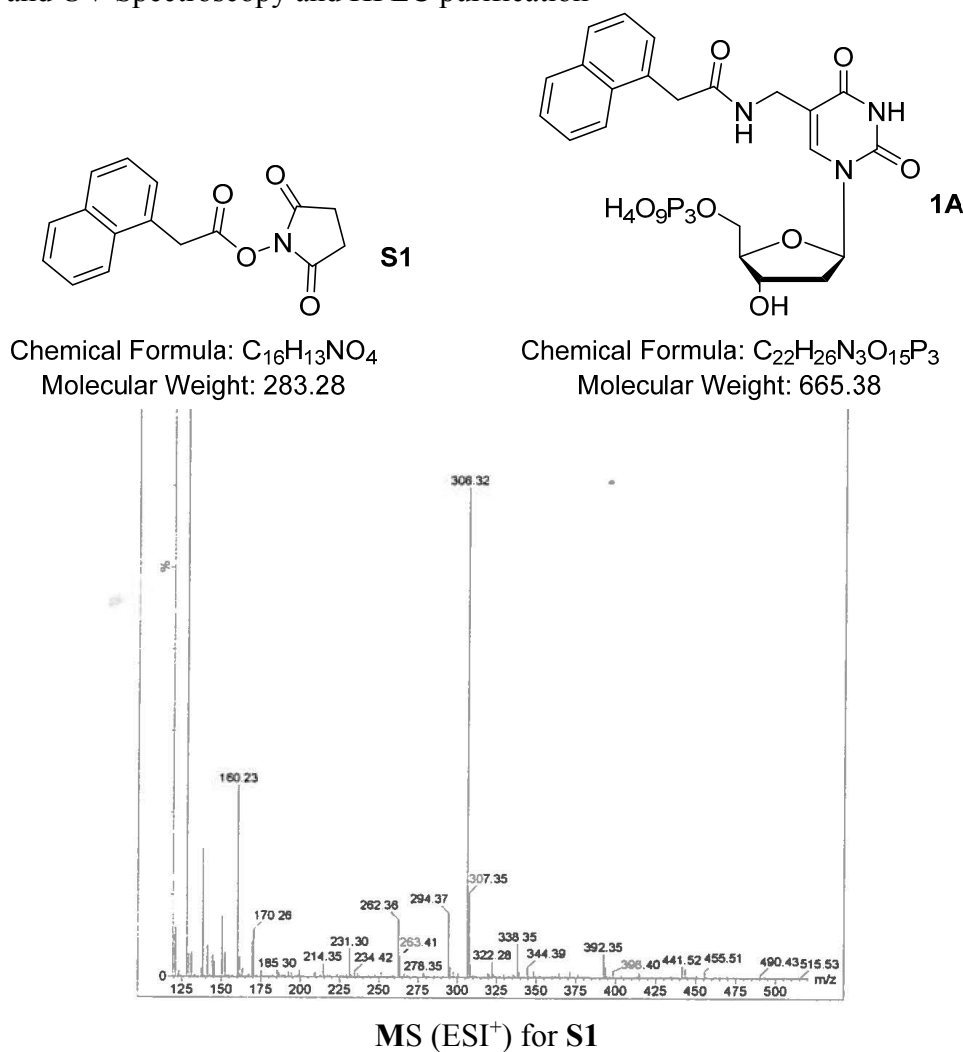

**Figure S1.** *Cont.*

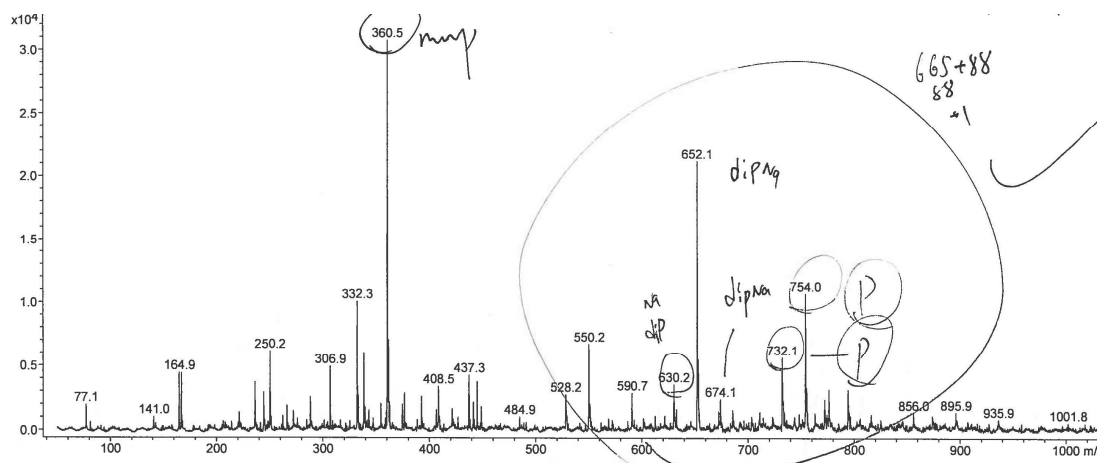MS (ESI<sup>+</sup>) for 1A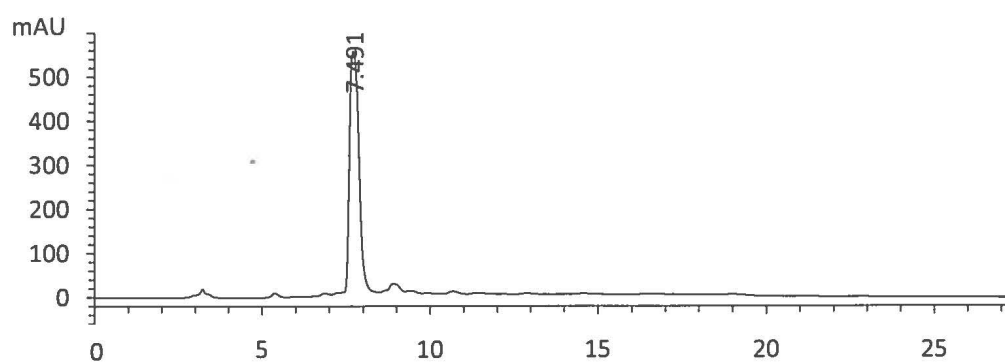

HPLC for 1A

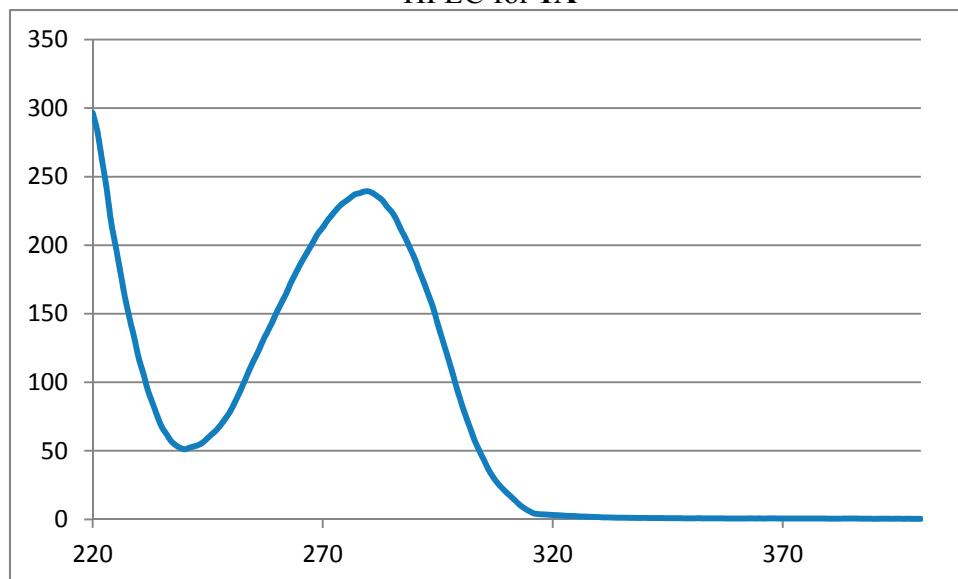

UV for 1A

**Figure S1.** Compound 1A: MS for S1, MS for compound 1A, HPLC, UV.

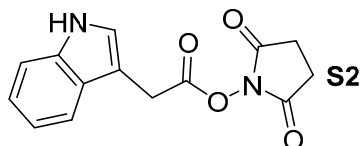

Chemical Formula:  $C_{14}H_{12}N_2O_4$   
Molecular Weight: 272.26

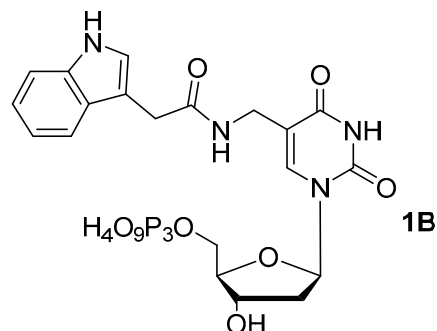

Chemical Formula:  $C_{20}H_{25}N_4O_{15}P_3$   
Molecular Weight: 654.35

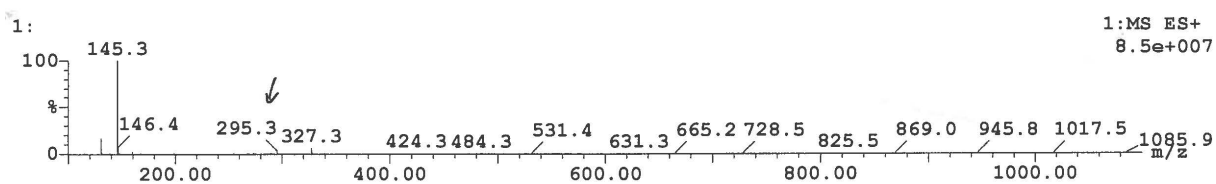

MS (ESI<sup>+</sup>) for S2

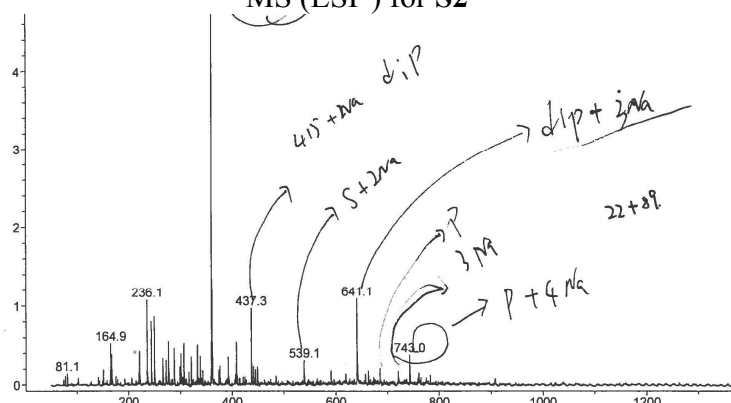

MS (ESI<sup>+</sup>) for 1B

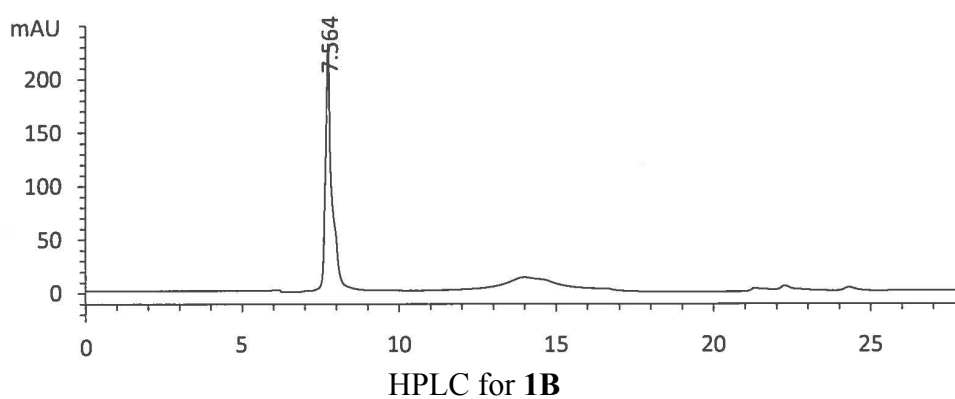

Figure S2. Cont.

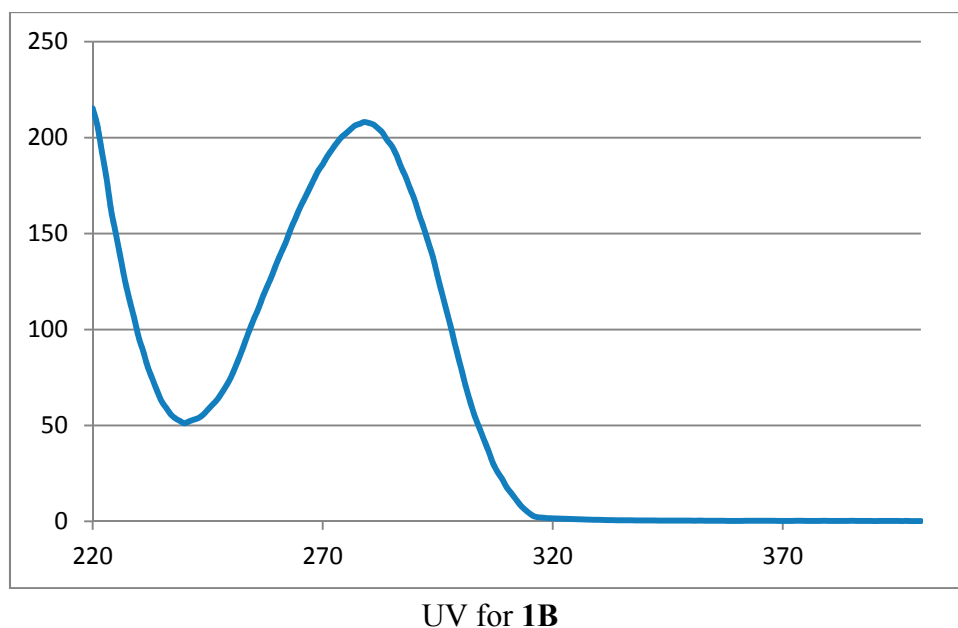

**Figure S2.** Compound **1B**: MS for modified group, MS, HPLC, UV for compound **1B**.

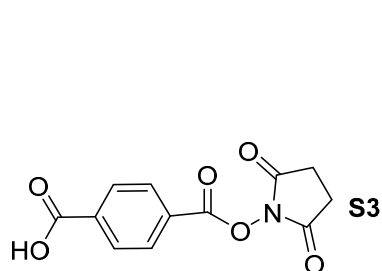

Chemical Formula:  $C_{12}H_9NO_6$   
Molecular Weight: 263.21

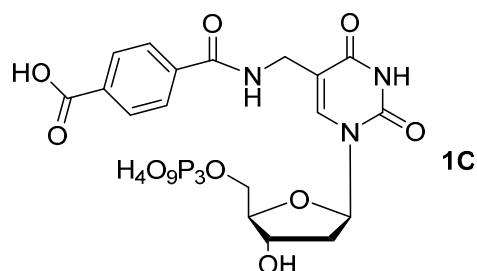

Chemical Formula:  $C_{18}H_{22}N_3O_{17}P_3$   
Molecular Weight: 645.30

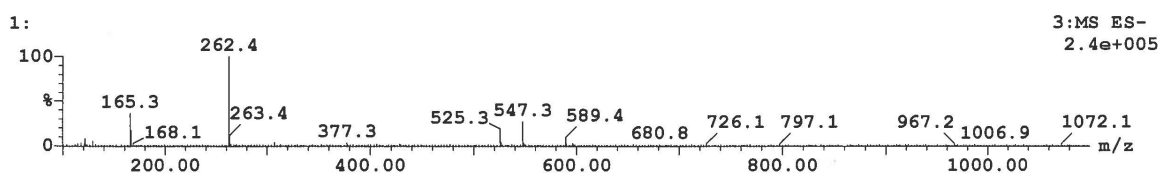

MS (ESI<sup>-</sup>) for **S3**

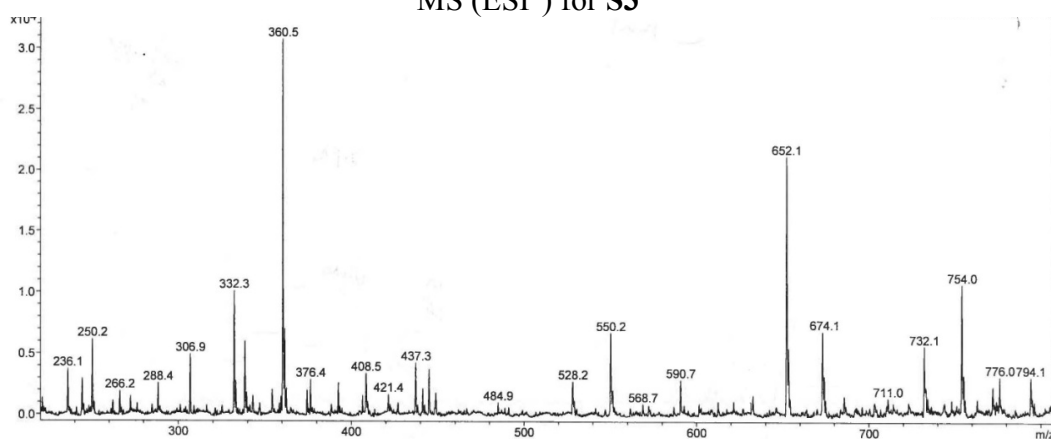

MS (ESI<sup>+</sup>) for **1C**

**Figure S3.** Cont.

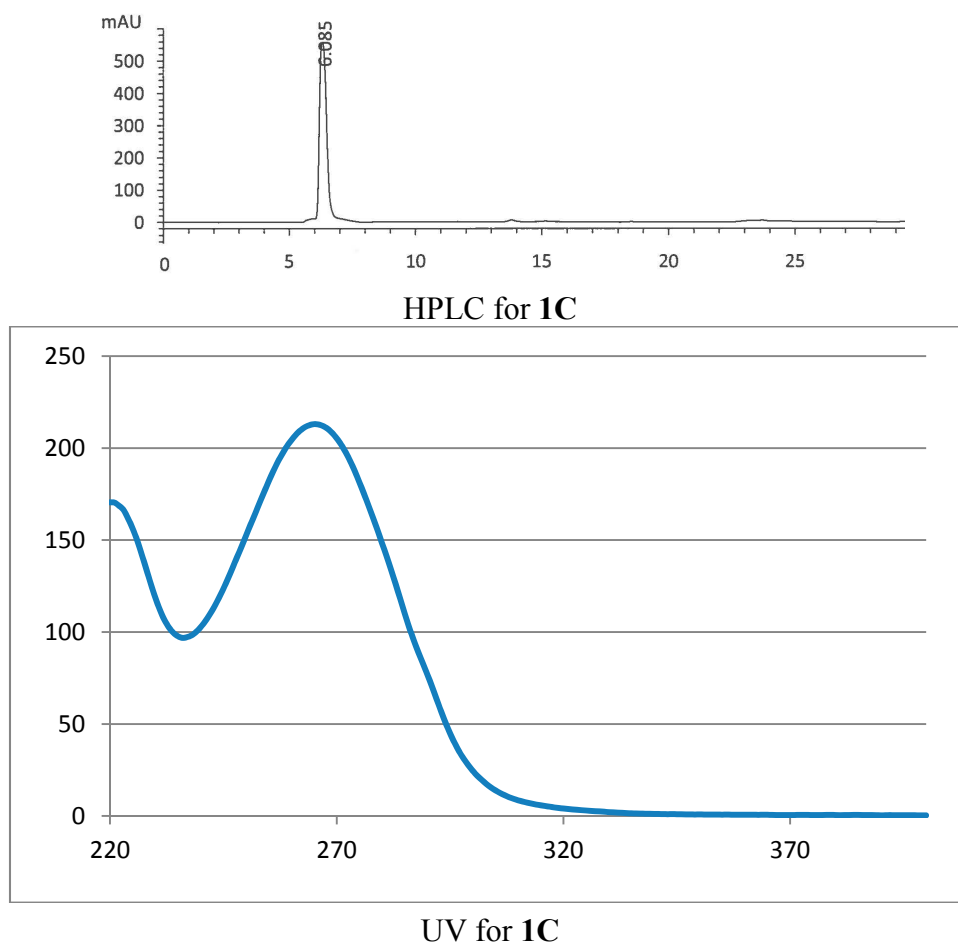

**Figure S3.** Compound **1C**: MS for modified group, MS, HPLC, UV for compound **1C**.

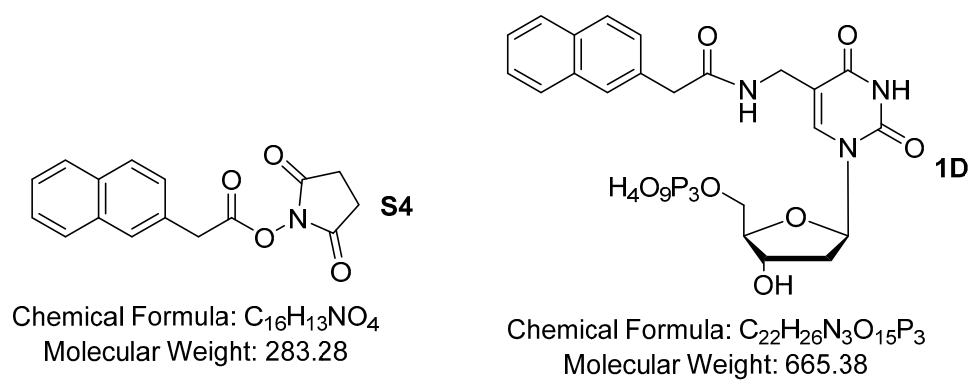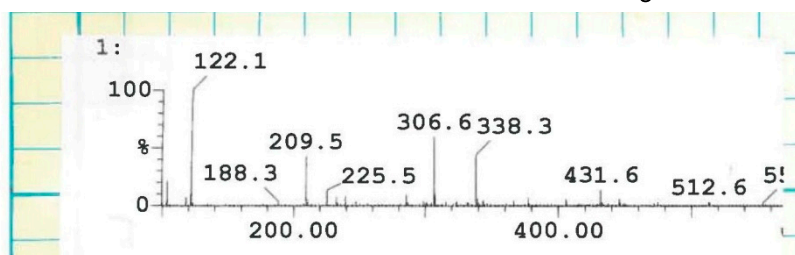

MS (ESI<sup>+</sup>) for **S4**

**Figure S4.** *Cont.*

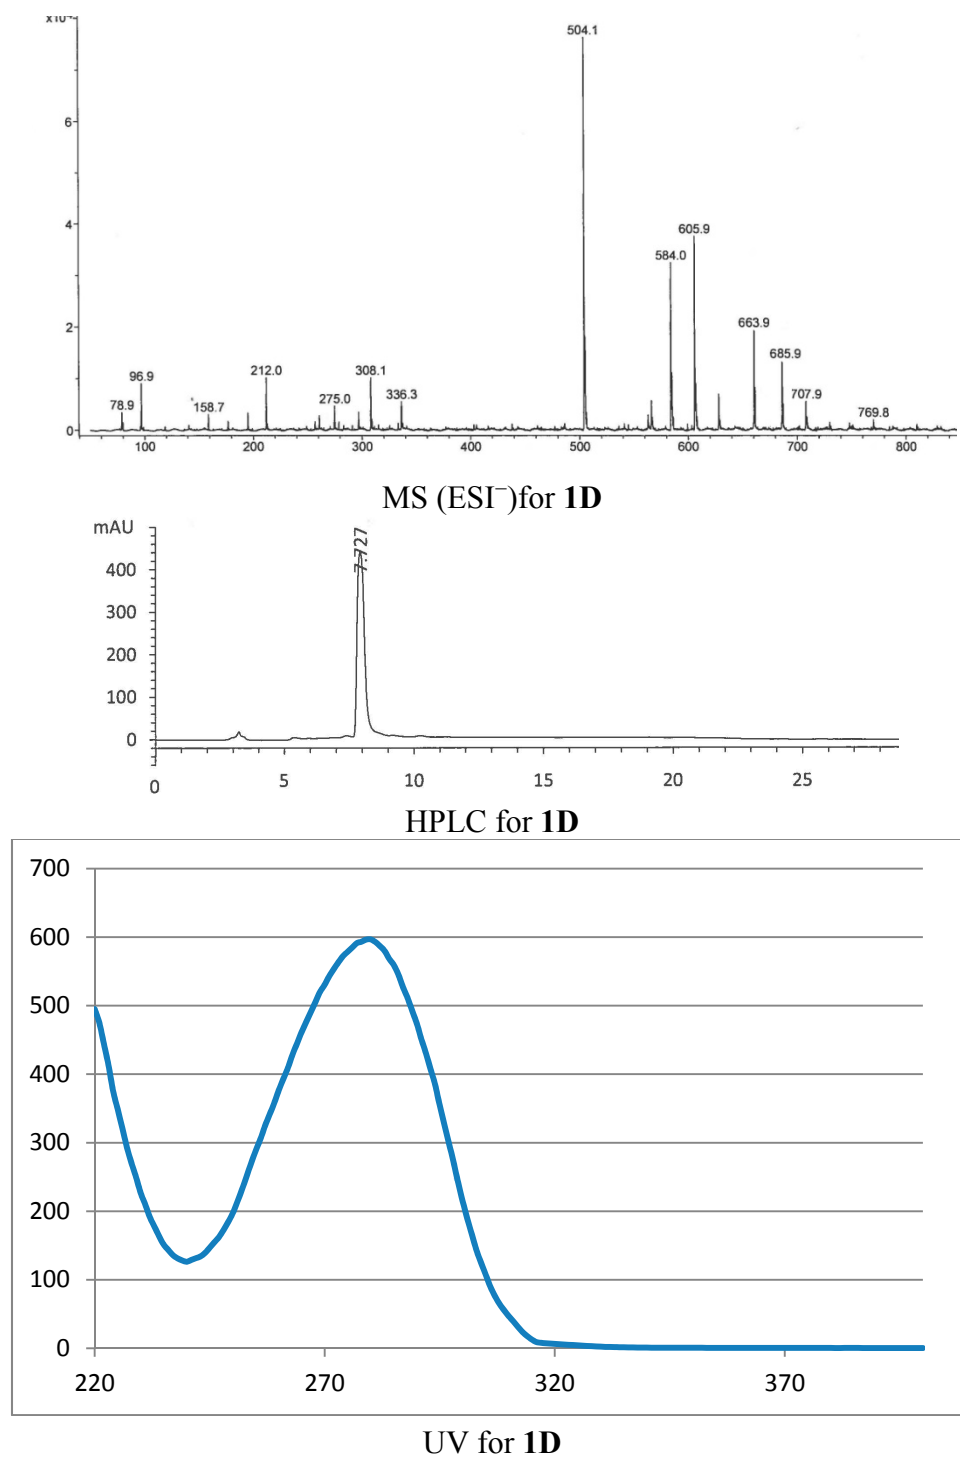

**Figure S4.** Compound **1D**: MS for modified group, MS, HPLC, UV for compound **1D**.

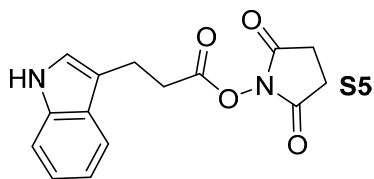

Chemical Formula:  $C_{15}H_{14}N_2O_4$   
Molecular Weight: 286.29

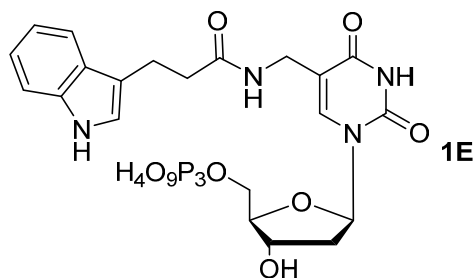

Chemical Formula:  $C_{21}H_{27}N_4O_{15}P_3$   
Molecular Weight: 668.38

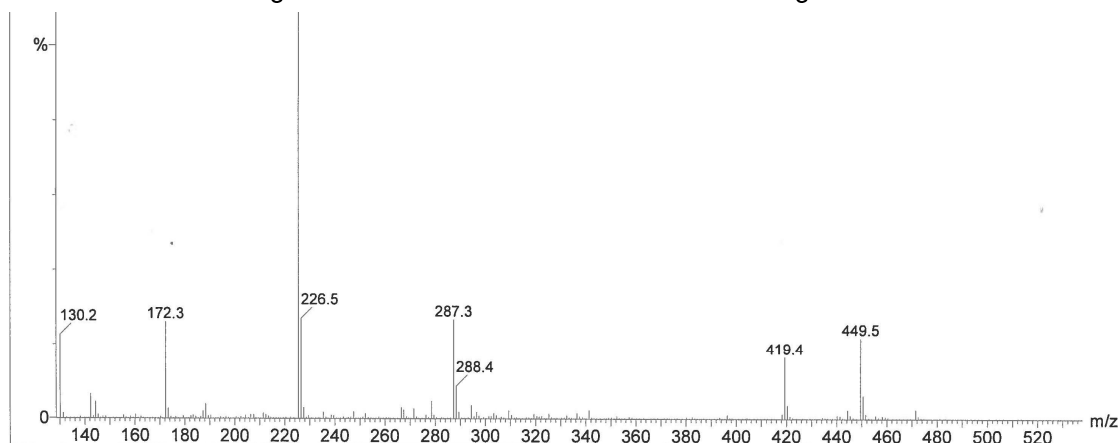

MS (ESI<sup>+</sup>) for **S5**

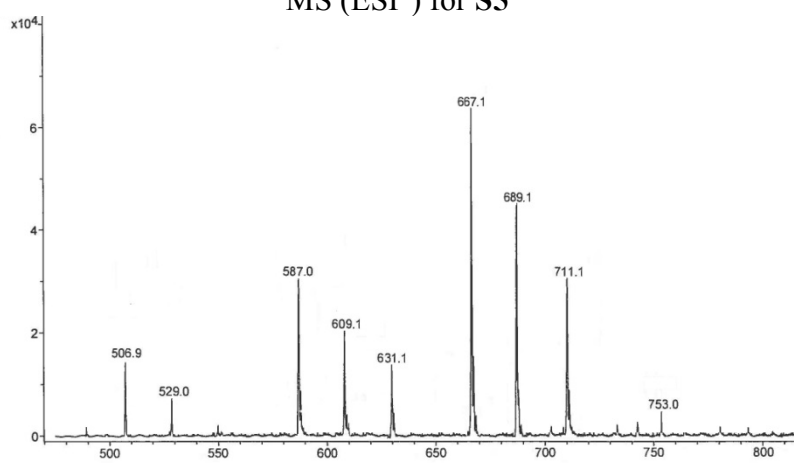

MS (ESI<sup>-</sup>) for **1E**

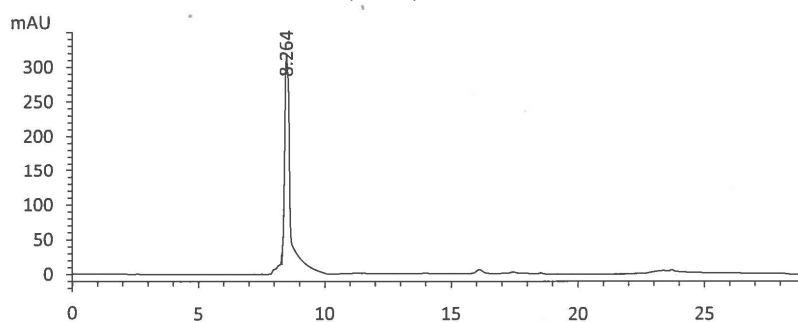

HPLC for **1E**

**Figure S5. Cont.**

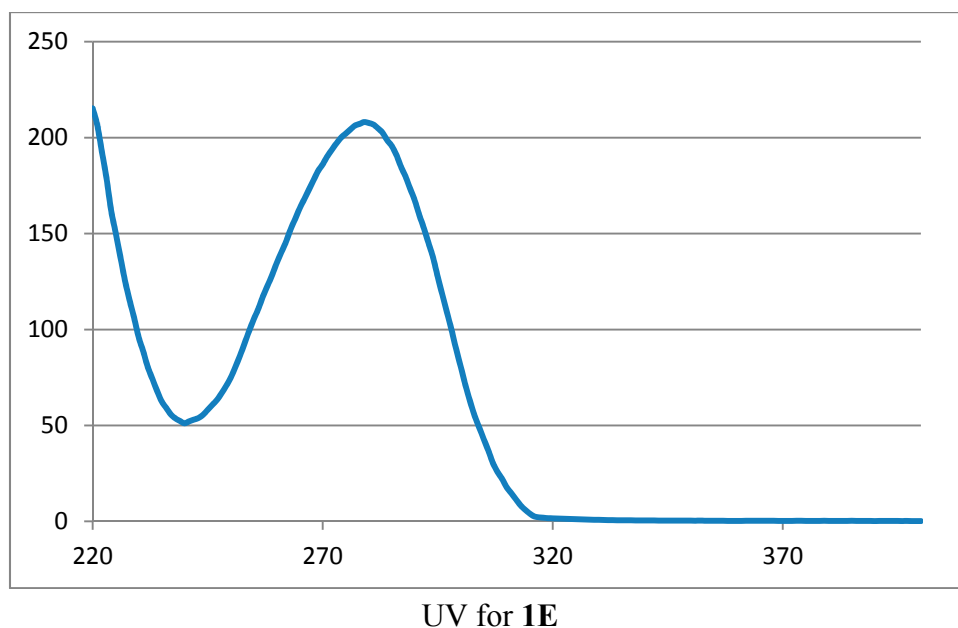

**Figure S5.** Compound **1E**: MS for modified group, MS, HPLC, UV for compound **1E**.

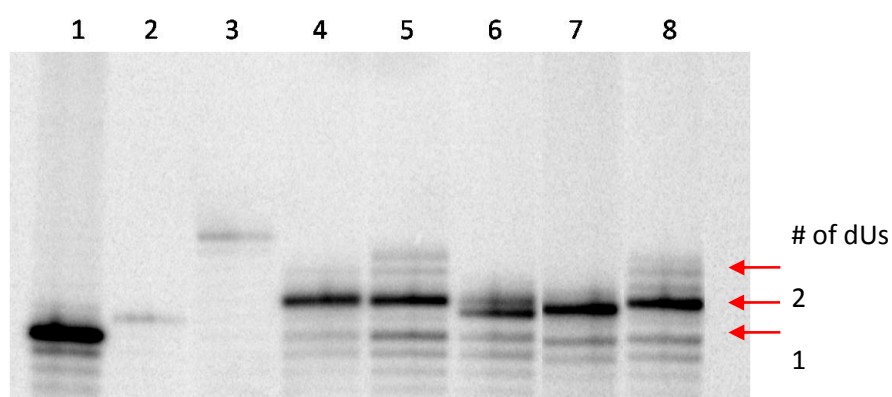

**Figure S6.** Single nucleoside triphosphate incorporation test (**T1**) with Sequenase. Lane 1, primer; lane 2, ddTTP (control); lane 3, dTTP (control); lane 4, compound **1A**; lane 5, compound **1B**; lane 6, compound **1C**; lane 7, compound **1D**; lane 8, compound **1E**

## Sequencing Results

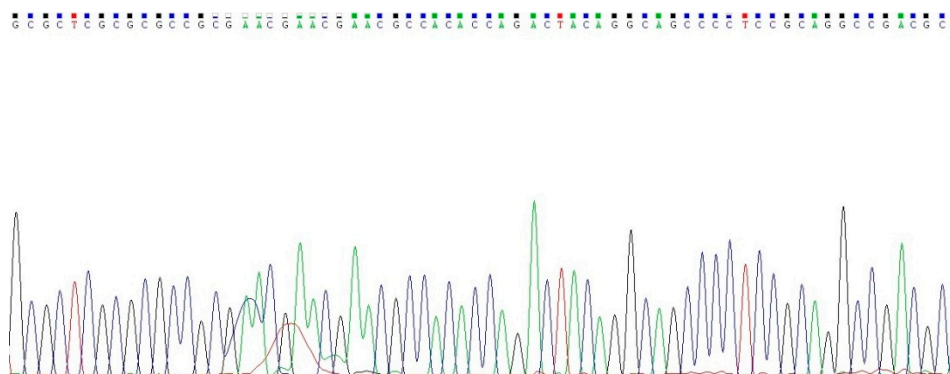

**Figure S7.** The sequencing data included two primer regions for the dTTP PCR amplicon (control—no modifications).



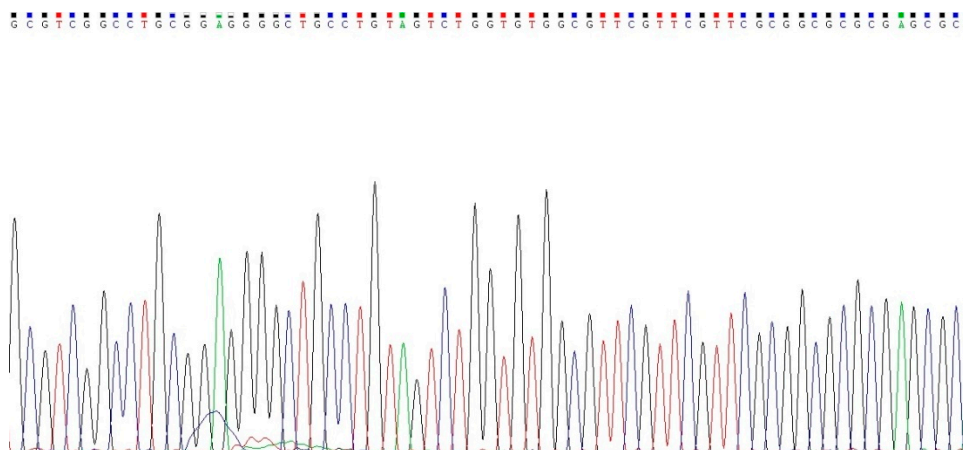

**Figure S8.** The sequencing data included two primer regions for the compound **1A** PCR amplicon.

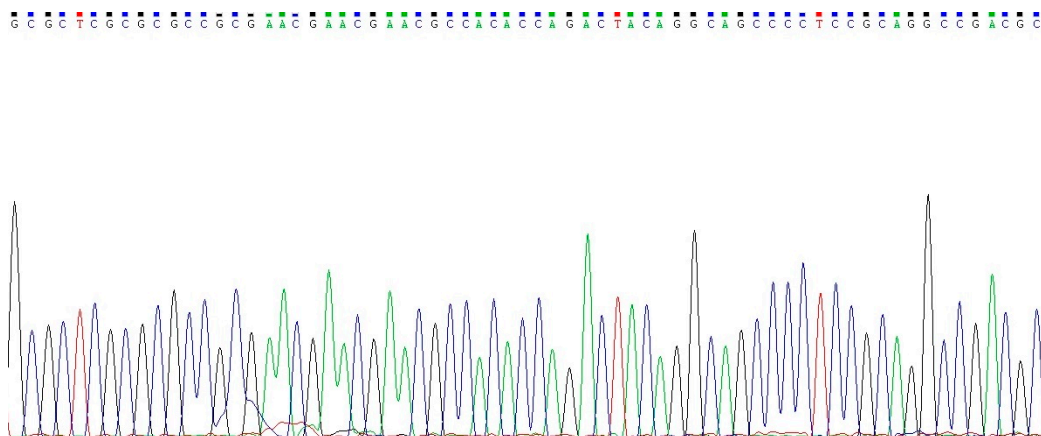

**Figure S9.** The sequencing data included two primer regions for the compound **1B** PCR amplicon.

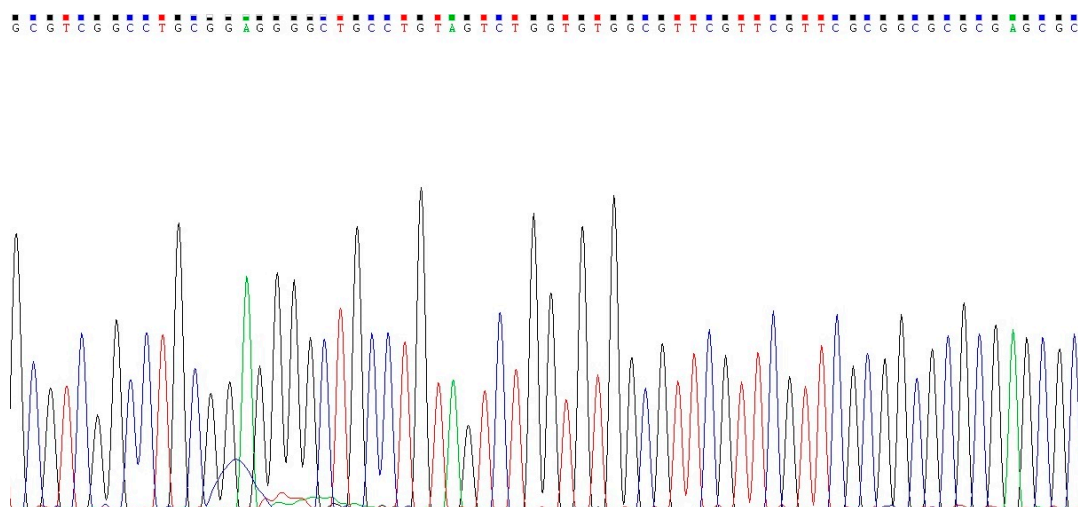

**Figure S10.** The sequencing data included two primer regions for the compound **1C** PCR amplicon.

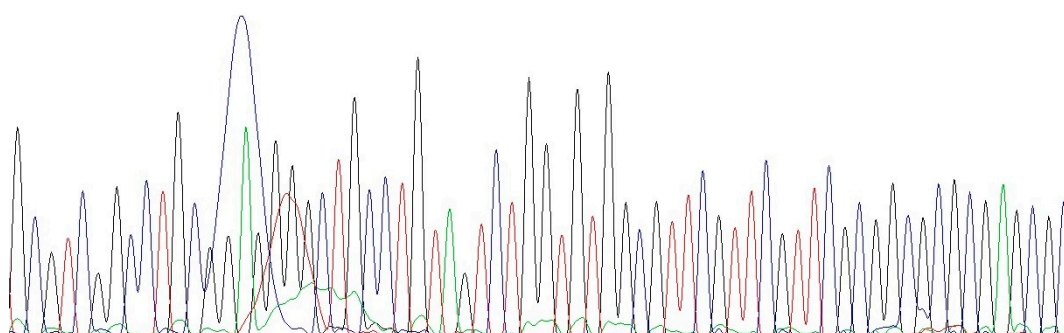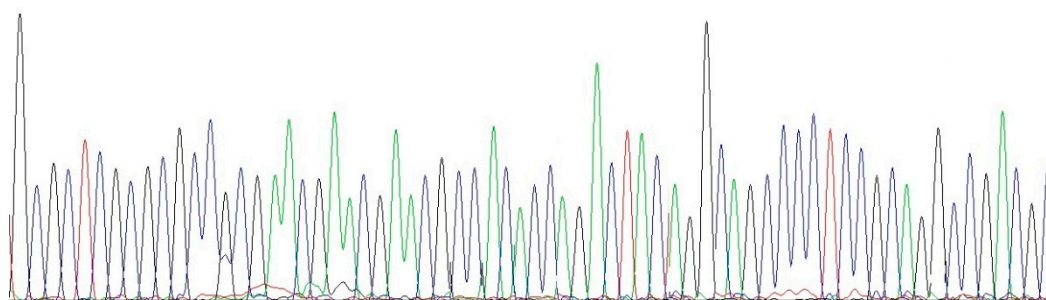

**Figure S12.** The sequencing data included two primer regions for the compound **1E** PCR amplicon.
